# Supplementary material for: Preclinical humanized bone models reveal metabolic reprogramming and simvastatin benefits in castration-resistant prostate cancer in bone
Source: Research Square preprint supplement (doi:10.21203/rs.3.rs-8720393/v1), 2026-02-10
Supplement: Supplementary file 1 [file 53fbb6985e1782f0bf99f155.docx]

**Supporting information**

**Table S1: Cell culture media composition**

| Media | | Components |
| --- | --- | --- |
| Osteoblastic media | Basal growth medium (GM) | αMEM, 10% (v/v) FBS, 1% (v/v) P/S |
| Osteogenic medium (OM) | αMEM, 10% (v/v) FBS, 1% (v/v) P/S, ascorbate-2-phosphate (50 µg/mL), β-glycerophosphate (10 mM), dexamethasone (100 nM) |
| Mineralization medium (MM) | αMEM, 10% (v/v) FBS, 1% (v/v) P/S, milk-extracted osteopontin (100 µg mL-1), calcium chloride dihydrate (9 mM), dipotassium phosphate(4.2 mM), HEPES (25 mM) |
| Adipogenic media | Adipocyte proliferation medium (APM) | DMEM, 10% (v/v) FBS, 1% (v/v) P/S and Glutamine (200 mM), heparin (90 μg/mL), FGF-1 (1 ng/mL) |
| Adipogenic induction medium (AIM) | DMEM, 10% (v/v) FBS, 1% (v/v) P/S and Glutamine (200mM), heparin (90 μg/mL), FGF-1 (1 ng/mL), IBMX (500 μM), rosiglitazone (2 μM), dexamethasone (250 nM), insulin (10 µg/mL) and indomethacin (100 μM) |
| Adipogenic medium (AM) | DMEM, 10% (v/v) FBS, 1% (v/v) P/S and Glutamine (200 mM), heparin (90 μg/mL), FGF-1 (1 ng/mL), IBMX (500 μM), dexamethasone (250 nM), insulin (10 µg/mL) and indomethacin (100 μM) |
| Cancer proliferation medium (CM) | | RPMI 1640, 5% (v/v) FBS |
| Coculture medium (CoM) | | DMEM, 10% (v/v) FBS, 1% (v/v) P/S and Glutamine (200 mM) |

αMEM and DMEM from Gibco™, fetal bovine serum (FBS), Penicillin/Streptomycin (P/S) and FGF-1 from ThermoFisher. Ascorbate-2-phosphate, β-glycerophosphate, dexamethasone, calcium chloride dihydrate, dipotassium phosphate, HEPES, heparin, IBMX, rosiglitazone, insulin, and indomethacin from Sigma-Aldrich. Milk-extracted osteopontin was a gift from Arla Food.

**Table S2: Primers sequences used for RTqPCR**

| Target Genes | Primers sequence (5’-3’) |
| --- | --- |
| Ribosomal protein L32 (RPL32) | F: GCACCAGTCAGACCGATATG  R: ACTGGGCAGCATGTGCTTTG |
| Beta-actin (ACTB) | F: CACCATTGGCAATGAGCGGTTC  R: AGGTCTTTGCGGATGTCCACGT |
| Fatty acid binding protein 4 (FABP4) | F: GGATGATAAACTGGTGGTGGAATG  R: CAGAATGTTGTAGAGTTCAATGCGA |
| Adiponectin (ADIPOQ) | F: AGTCTCACATCTGGTTGGGG  R: CTCTCTGTGCCTCTGGTTCC |
| Leptin (LEP) | F: CGGATTCTTGTGGCTTTGG  R: TGACTGCGTGTGTGAAATG |
| Perilipin-1 (PLIN1) | F: ACCCCCCTGAAAAGATTGCTT  R: GATGGGAACGCTGATGCTGTT |
| Hormone-sensitive lipase (LIPE) | F: GCGGATCACACAGAACCTGGAC  R: AGCAGGCGGCTTACCCTCAC |
| Peroxisome proliferator-activated receptor gamma (PPARγ) | F: GAAACTTCAAGAGTACCAAAGTG  R: AGGCTTATTGTAGAGCTGAGTCTTCTC |
| Glucose transporter type 4 (SLC2A4) | F: ATGCTGCTGCCTCCTATGAA  R: CAGTTGGTTGAGCGTCCC |
| Prostate specific antigen (KLK3) | F: AGTGCGAGAAGCATTCCCAAC  R: CCAGCAAGATCACGCTTTTGTT |
| Androgen receptor (AR) | F: CTGGACACGACAACAACCAG  R: CAGATCAGGGGCGAAGTAGA |
| Adipose triglyceride lipase (PNPLA2) | F: GTGTCAGACGGCGAGAATG  R: TGGAGGGAGGGAGGGATG |
| Fatty acid translocase (CD36) | F: CTTTGGCTTAATGAGACTGGGAC  R: GCAACAAACATCACCACACCA |
| Lipoprotein lipase (LPL) | F: GGAAAGGCACCTGCGGTATT  R: AGATTCGCCCAGTTTCAGCC |
| Aquaporin 7 (AQP7) | F: GGCACAGGCGGTCCAC  R: CATGAACTCGGCCAGGAACT |
| Colony-stimulating factor 1 (CSF1) | F: GCCAGTGAGATTCCCGTACC  R: TGCCTCTCATGGCCAGTTAC |
| ATP-binding cassette (ABCC3) | F: GCCCCAGTTAATCAGCAACC  R: TATGGTGATGGCATAGCCTGG |
| Fibroblast growth factor 7 (FGF7) | F: AAGTTGCACCAGGCAGACA  R: CGCTGTTTGCTATTTGACTTTTGT |
| Serine proteinase inhibitor E1 (SERPINE1) | F: CTCCTCATCCACAGGAGCTT  R: ATGGGGGACATTCACTCTGC |
| Ferritin heavy chain 1 (FTH1) | F: CAGAACTACCACCAGGACTCAG  R: GTCATCACAGTCTGGTTTCTTGATA |

**Table S3: Antibodies used for chromogenic immunohistochemistry**

| Protein | Cat. No. | Company | RRID | Anti (species) | Antigen retrieval | Dilution | Incub. | Color dev. |
| --- | --- | --- | --- | --- | --- | --- | --- | --- |
| PSA | A0562 | Dako Omnis | - | Human | Sodium Citrate pH 6.0, 5 min, 95°C | 1:500 | o/n, 4°C | 1min30s |
| Ki67 | ab15580 | Abcam | AB_443209 | Human, Mouse | Automatic staining on Ventana | | | |
| CD68 | ab108595 | Abcam | AB_10866185 | Human | Tris-EDTA pH 9.0, 5min, 95°C | 1:300 | 1 h, RT | 3min |
| vWf | GA527 | Dako Omnis | - | Human | Proteinase K, 5min, RT | Read-to-use | o/n, 4°C | 2min |
| PaI-1 | MA517171 | ThermoFisher | AB_2538642 | Human, Mouse | Proteinase K, 5min, RT | 1:500 | o/n, 4°C | 3min |
| Ferritin | PA572921 | ThermoFisher | AB_ 2913583 | Human, Mouse, Rat | Proteinase K, 5min, RT | 1:500 | o/n, 4°C | 2min30s |


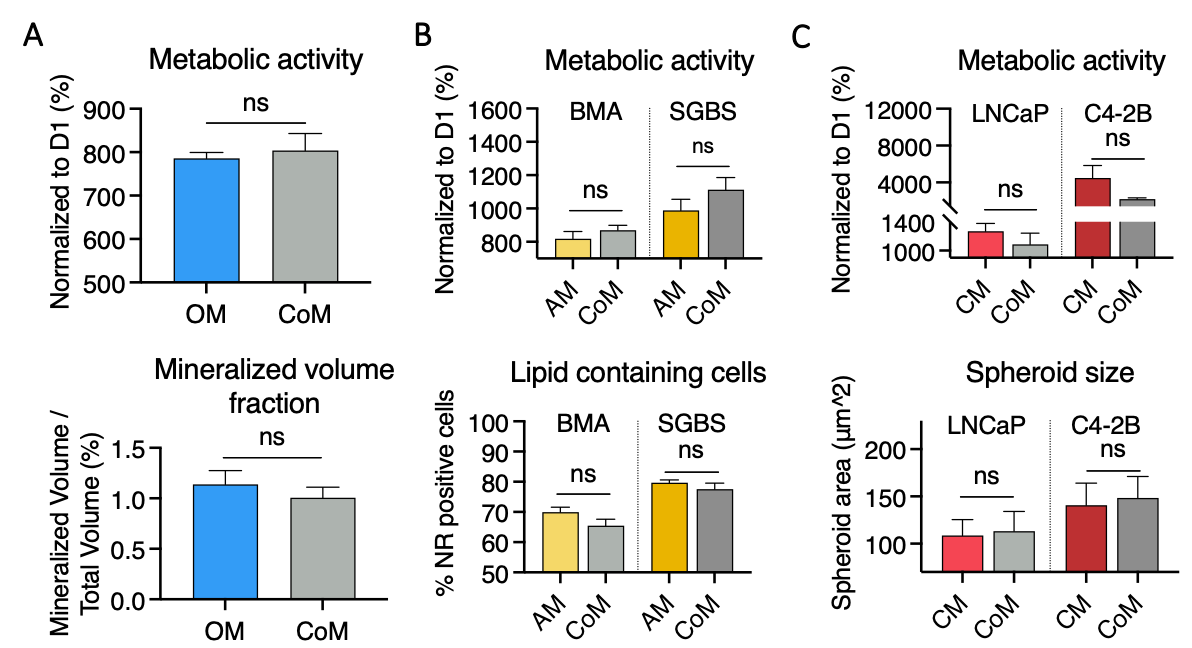


**Figure S1: Validation of the simplified medium for the coculture between osteoblasts, adipocytes and prostate cancer cells.**

**A)** Metabolic activity and mineralized volume fraction quantification from osteoblastic microtissues (already differentiated and mineralized for four weeks) after one week of culture in coculture medium (CoM) compared to osteogenic medium (OM). **B)** Metabolic activity and quantification of the proportion of lipid droplet (LD) containing cells from adipose microtissues (SGBS or BMSCs already differentiated for three weeks) after one week of culture in coculture medium (CoM) compared to adipogenic medium (AM), from nile red (NR) staining. **C)** Metabolic activity and spheroid area quantification from prostate cancer microtissues (already grown as spheroids for one week) after one week of culture in coculturcoculture medium (CoM) compared to cancer proliferation medium (CM).


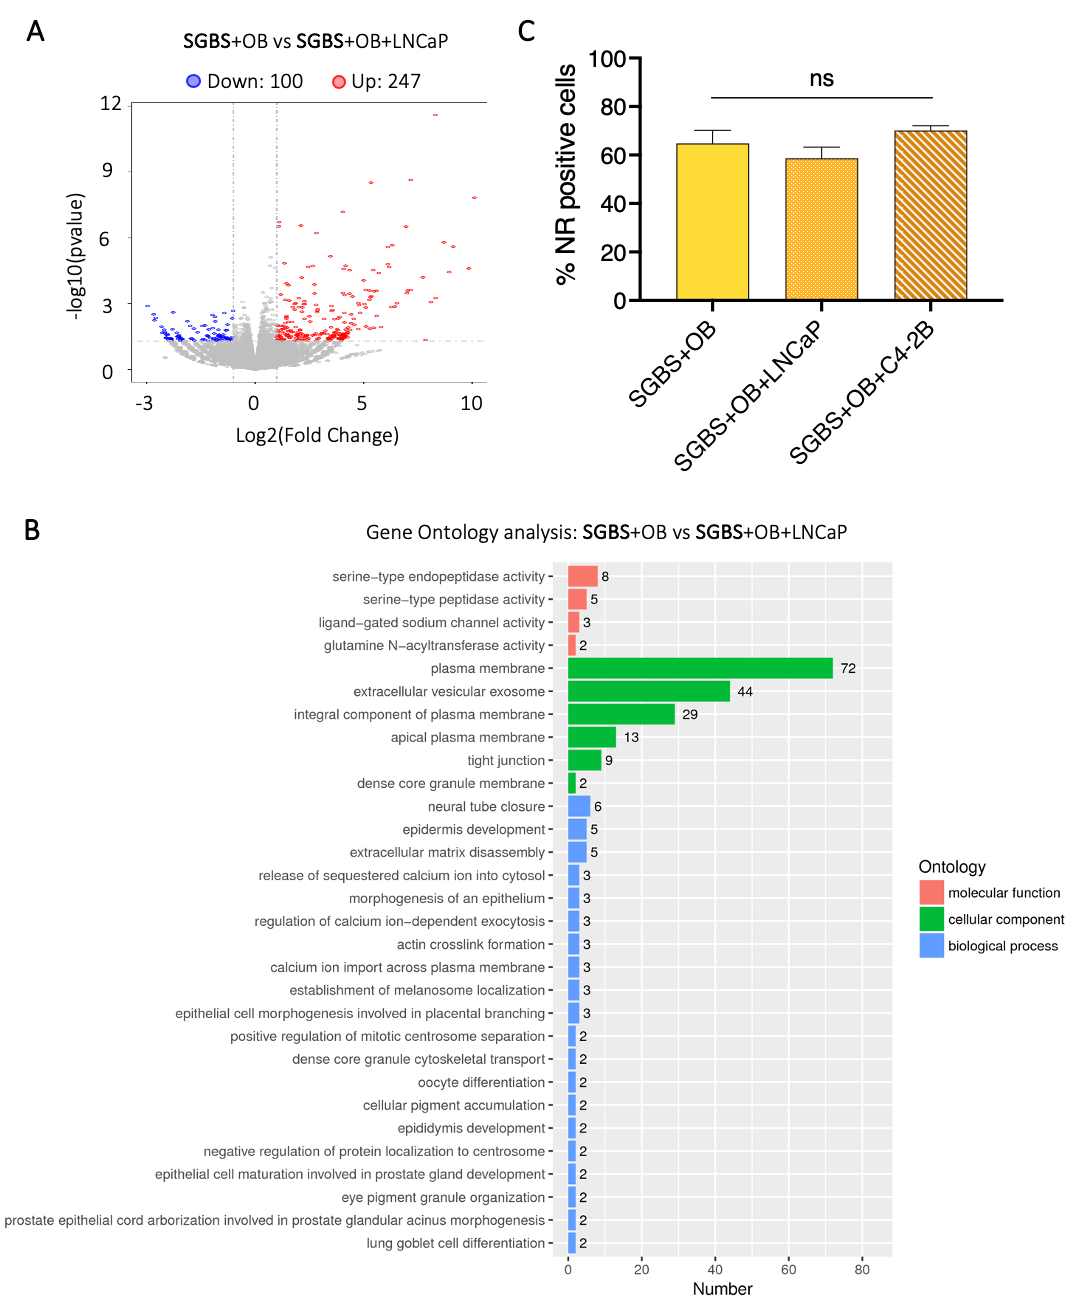


**Figure S2: Differential gene expression in SGBS cells after one week of coculture with LNCaP cells.**

RNAseq analyses with **A)** volcano plot and **B)** gene ontology (GO) analyses of differentially expressed genes between SGBS-derived adipocytes after coculture with osteoblast microtissues ± LNCaP cells for one week. **C)** Quantification of the proportion of lipid droplets-containing adipocytes from nile red staining (NR). Graphs: Mean+SE, n=3 per condition, General Linear Model (Univariate), ns: not significant.


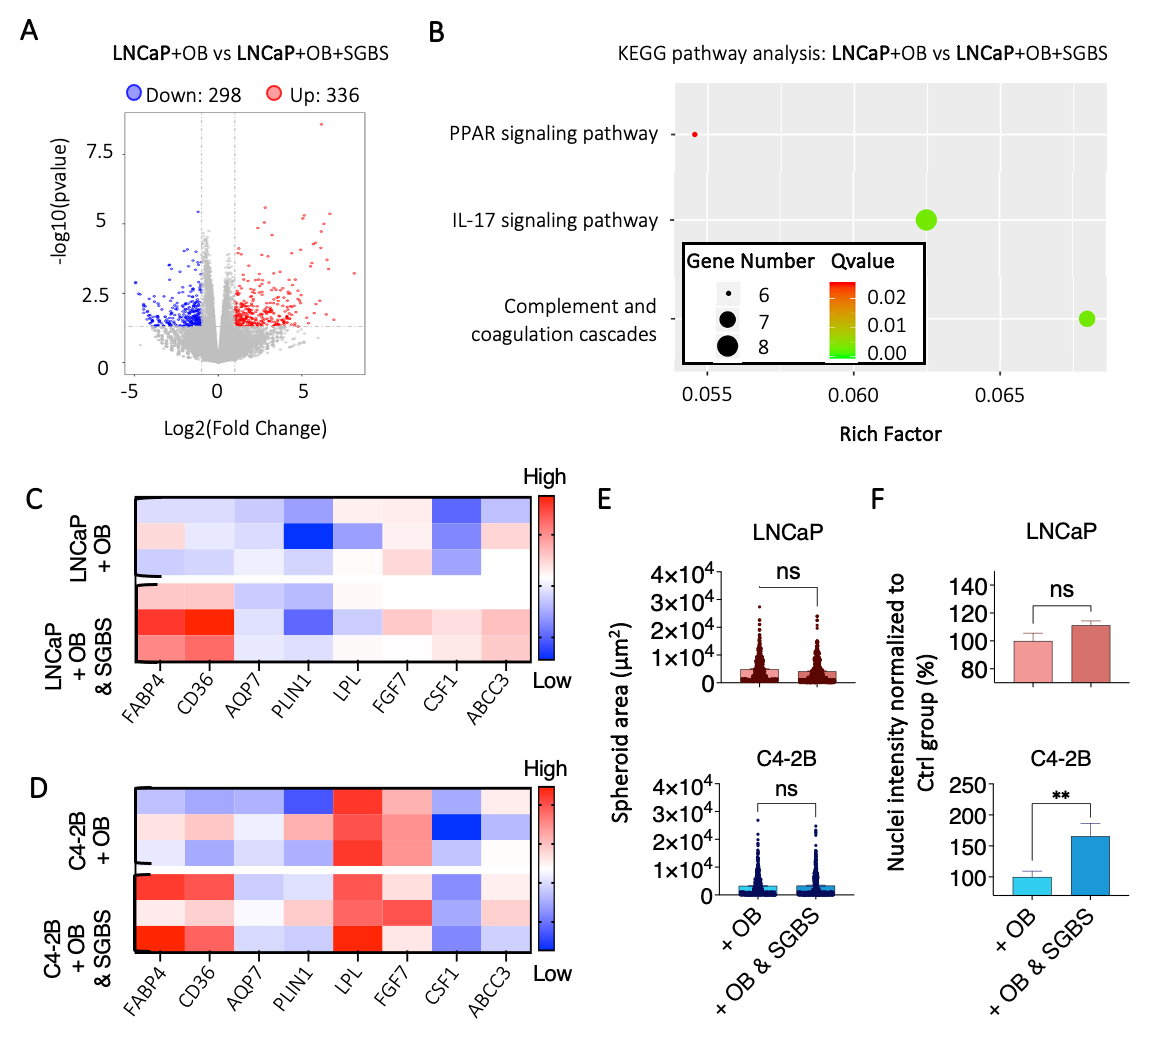


Figure S3: SGBS-derived adipocytes enhance lipid metabolism in PCa cells without affecting cell proliferation, similarly to bone marrow adipocytes.

RNAseq analyses on LNCaP cells after one week of coculture with osteoblast microtissues ± SGBS adipocytes, with **A)** volcano plot, and **B)** KEGG pathway. Heatmap analyses of differentially expressed genes from **C)** LNCaP and **D)** C4-2B cells after one week of coculture with osteoblast microtissues ± SGBS-derived adipocytes (mean ΔCq, n = 3). **E)** Spheroid size and **F)** nuclei intensity quantification from immunofluorescence images (OB: osteoblasts). Graphs: Mean+SE, all data points, n = 3, General Linear Model (Univariate), ns: not significant, ***p*<0.01.


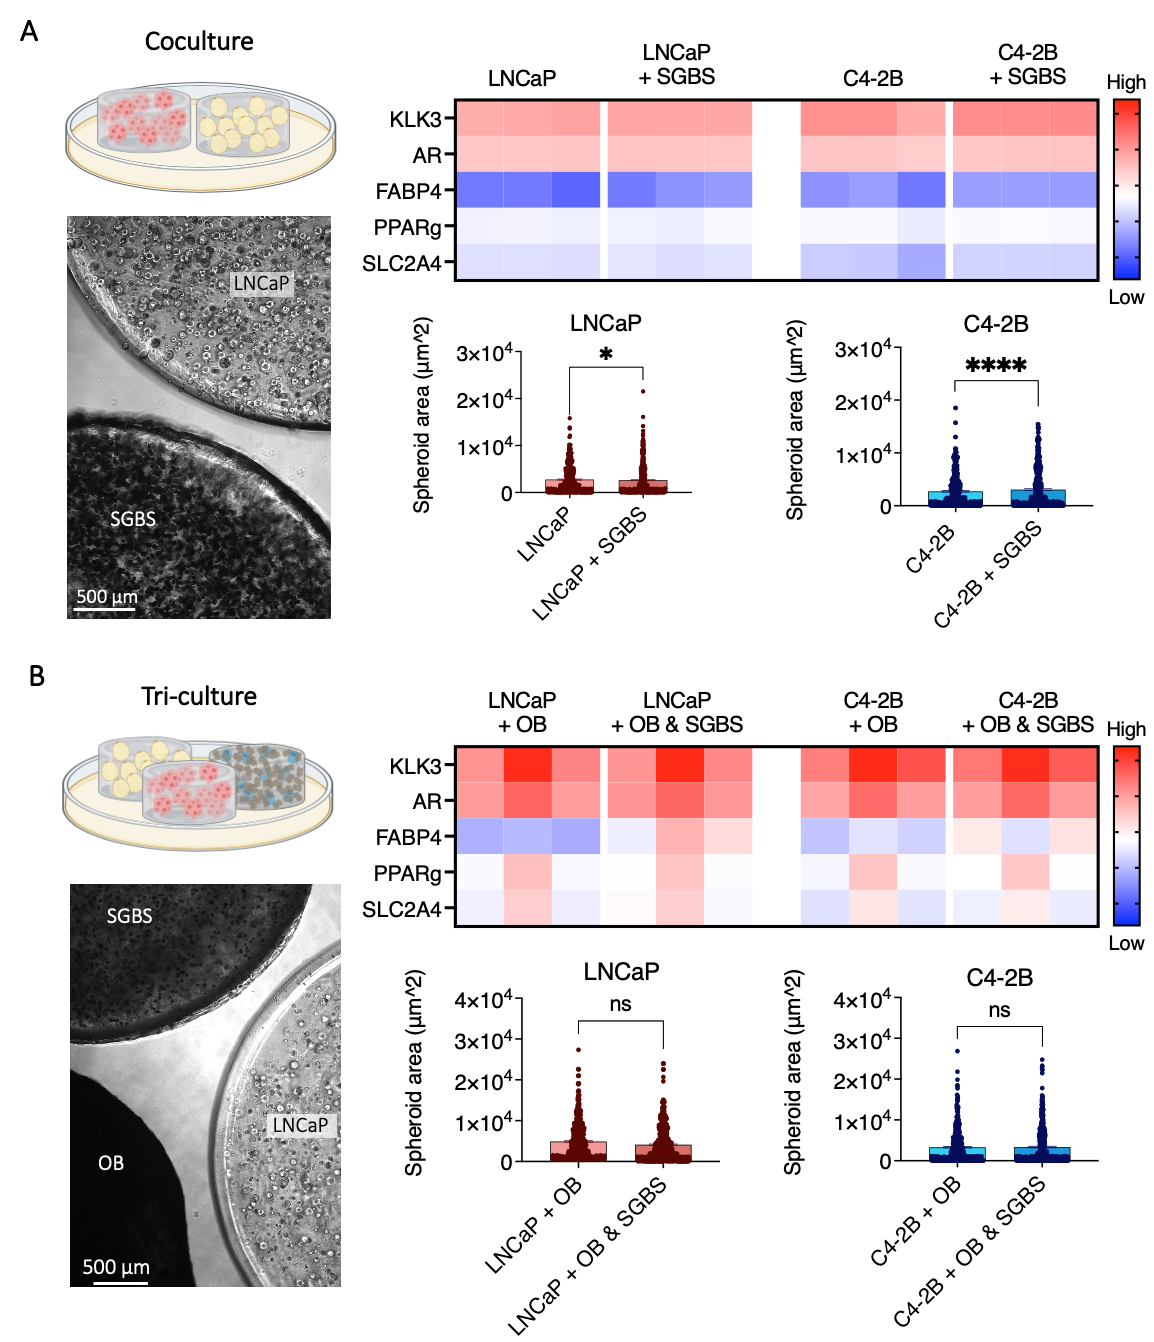


**Figure S4: Integration of osteoblasts into the coculture system alters the influence of adipocytes on prostate cancer cells.**

Representative brightfield images, gene expression analysis by RT-qPCR (mean ΔCq, n = 3) and quantification of spheroid size from LNCaP and C4-2B cells after one week of coculture with SGBS-derived cells **A)** without, or **B)** with osteoblasts. Graphs: Mean+SE, all data points, n = 3, General Linear Model (Univariate), ns: not significant, **p*<0.05, *****p*<0.0001.


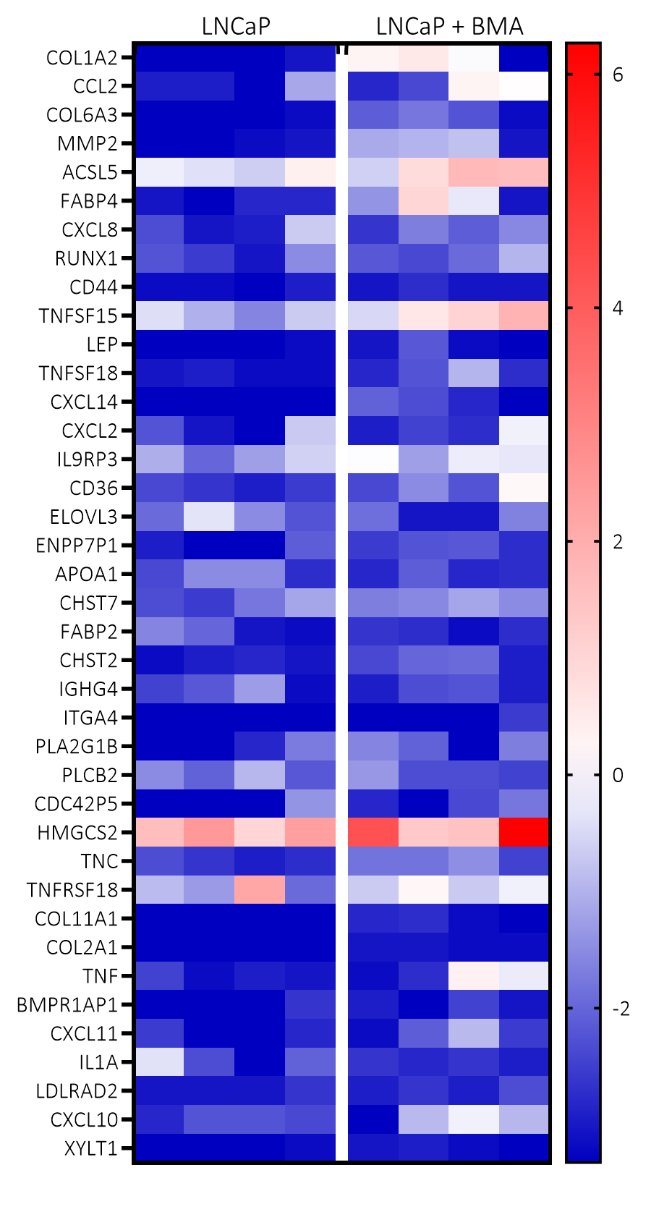


Figure S5: Effects of bone marrow adipocytes on LNCaP bone xenografts gene expression

Heatmap of differentially expressed genes between LNCaP tumors ± adipocytes and treated with vehicle for four weeks. Selection of the 40 genes the most significantly affected by the presence of adipocytes, related to the most affected pathways. Log2(FPKM+0.1) shown, n=4 per condition.


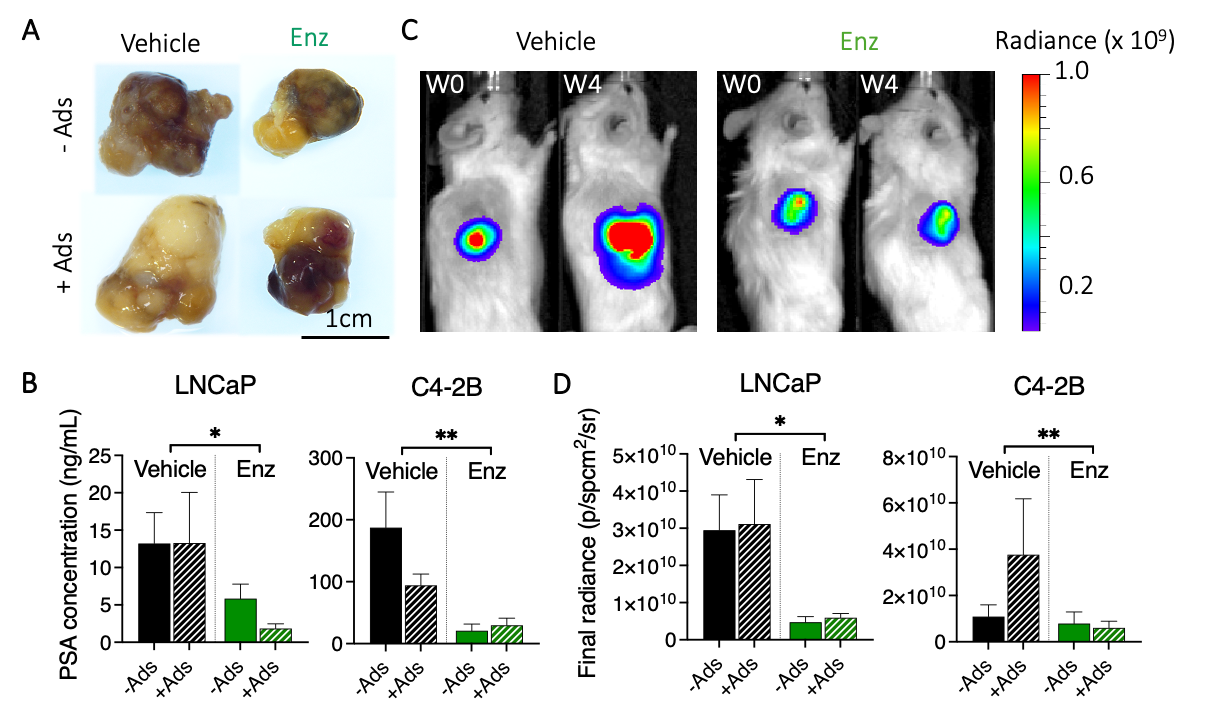


**Figure S6: Effect of human adipocytes on PCa bone xenografts in response to enzalutamide.**

**A)** Representative macroscopic images of *ex vivo* LNCaP-derived bone tumors after fixation with paraformaldehyde. **B)** Prostate-specific antigen (PSA) concentration after four weeks of treatment ± enzalutamide from LNCaP- and C4-2B-derived bone tumors. **C)** Representative images of bioluminescence on LNCaP-derived bone tumors at week 0 and week 4 after castration and **D)** quantification of bioluminescence signal at endpoint from LNCaP- and C4-2B-derived bone tumors. Graphs: Mean+SE, n = 8-9 for LNCaP, n = 4 for C4-2B, General Linear Model (Univariate), **p*<0.05, ***p*<0.01.Ads: SGBS-derived adipocytes.


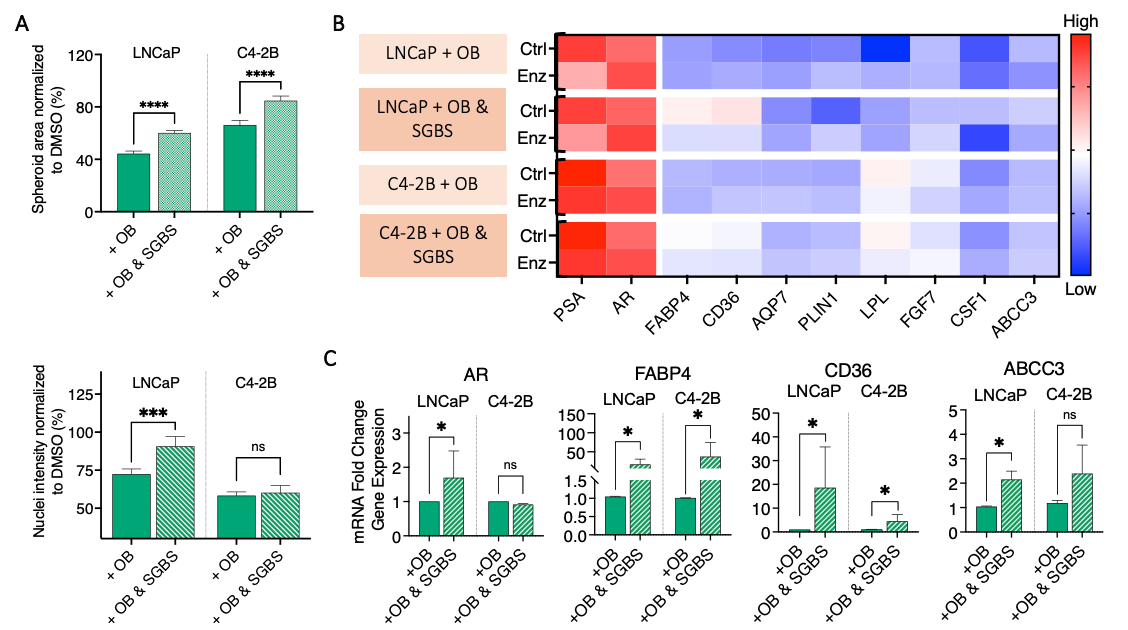


**Figure S7: Cancer-associated human SGBS-derived adipocytes enhance enzalutamide resistance in PCa cells**

**A)** Quantification of spheroid area and nuclei intensity from immunofluorescence images, **B)** heatmap analyses of differentially expressed genes (mean ΔCq, n = 3) and **C)** mRNA fold change from *AR, FABP4, CD36* and *ABCC3* under enzalutamide treatment (normalised to enzalutamide treatment without SGBS) from LNCaP and C4-2B cells after one week of coculture with osteoblast microtissues ± SGBS-derived adipocytes. Graphs: Mean+SE, n = 3, General Linear Model (Univariate), ns: not significant, **p*<0.05, ****p*<0.001, *****p*<0.0001.

**
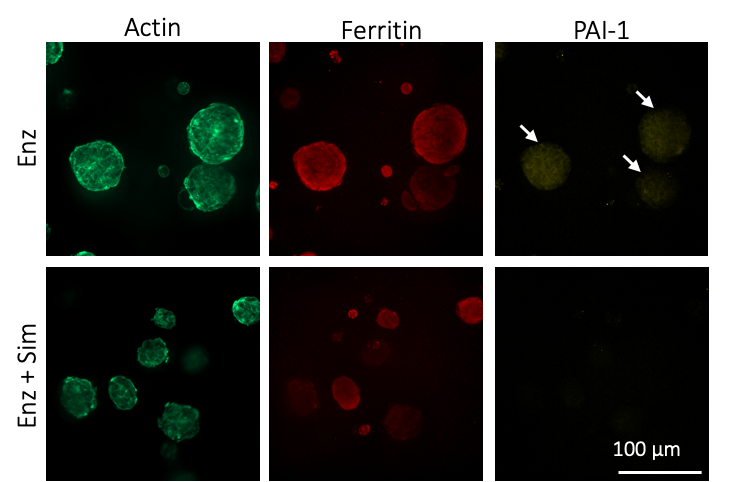
**

Figure S8: Combination of enzalutamide with simvastatin on LNCaP cells reduced ferritin and PAI-1 expression.

Representativeimages of the detection of PAI-1 (white arrows) and ferritin using immunofluorescence on LNCaP spheroids cocultured with human BMAs after one week of treatment with enzalutamide + simvastatin compared to enzalutamide treatment.


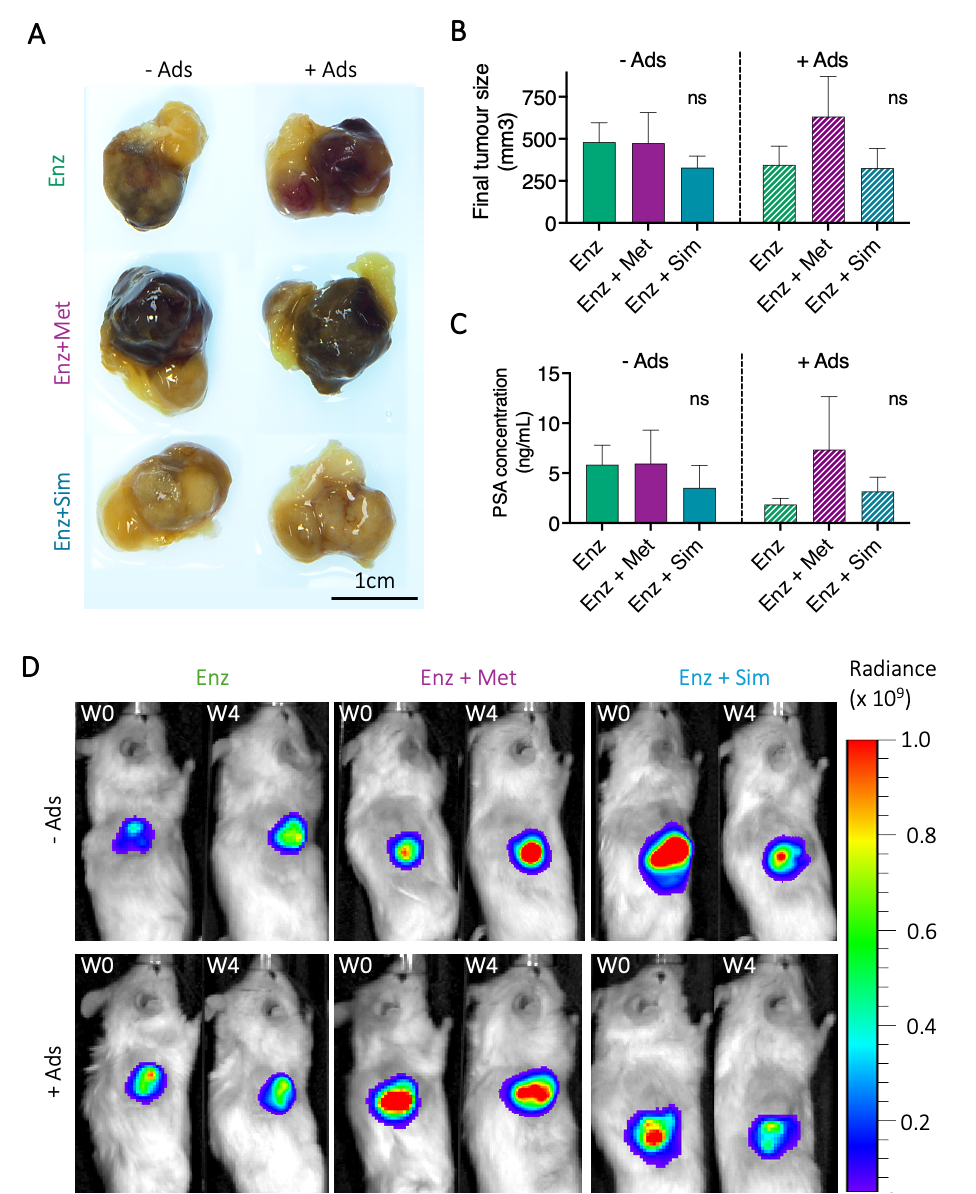


Figure S9: Effect of combined treatments on LNCaP bone metastases size and PSA level at endpoint.

**A)** Representative macroscopic images and **B)** quantification of *ex vivo* bone tumors at endpoint. **C)** Prostate specific antigen (PSA) concentration at endpoint and **D)** Representative images of bioluminescence at week 0 and week 4 after castration. Graphs: Mean+SE, n = 8-9, General Linear Model (Univariate), ns: not significant. Ads: SGBS-derived adipocytes.


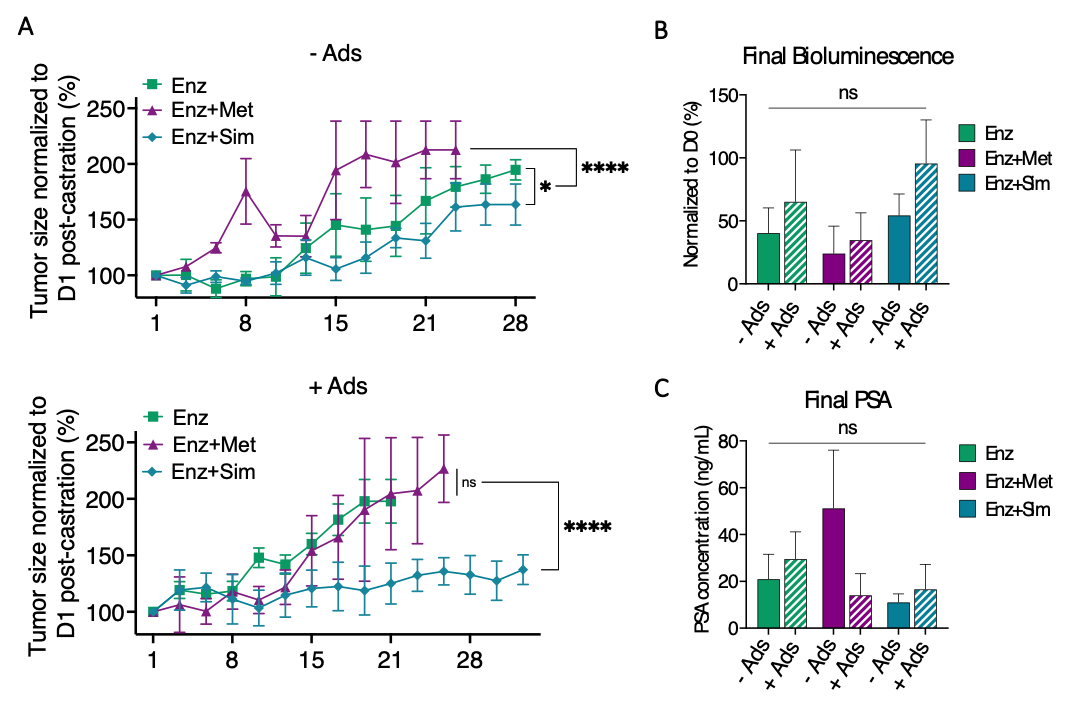


**Figure S10: Effect of combined treatments on C4-2B bone metastases.**

**A)** Tumor size progression overtime when treated with enzalutamide ± metformin or simvastatin in absence or presence of human adipocytes. **B)** Final bioluminescence radiance value normalized to day 0 of treatment. **C)** Prostate specific antigen (PSA) concentration at endpoint. Graphs: Mean+SE, n = 4, General Linear Model (Univariate), ns: not significant, *p<0.05, ****p<0.0001. Ads: SGBS-derived adipocytes.


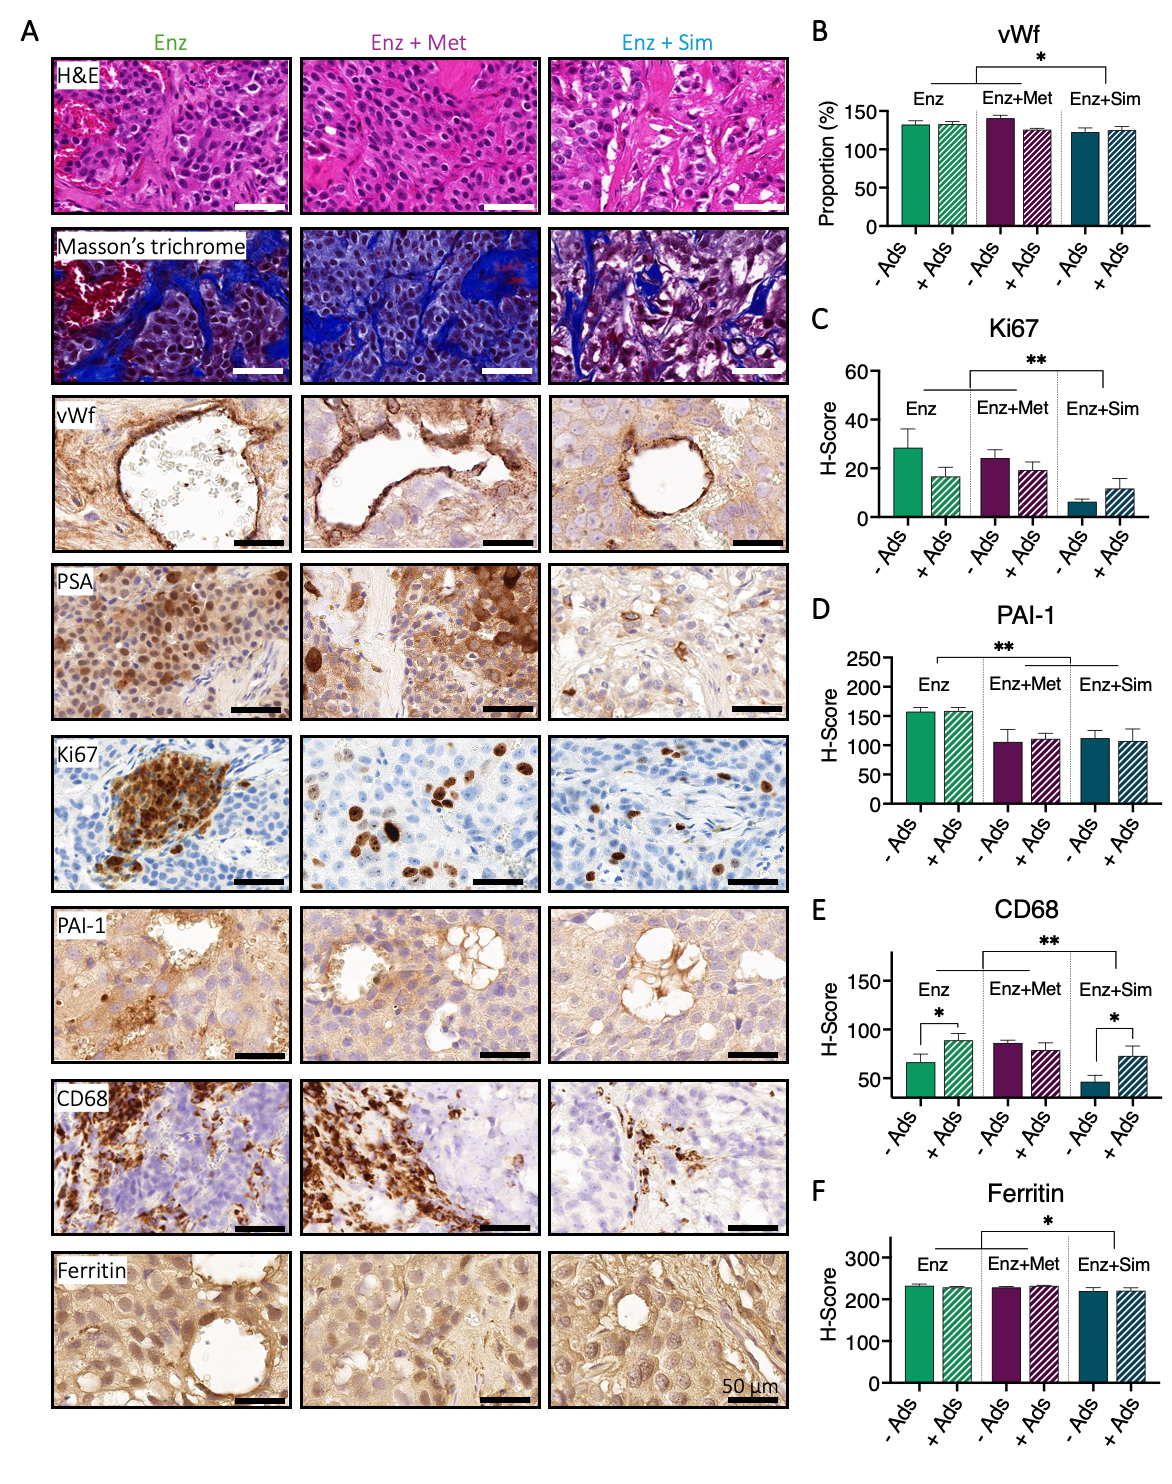


Figure S11: Histology analyses of LNCaP xenografts treated for four weeks with enzalutamide or combined treatments.

**A)** Representative images and quantification of **B)** vascularization (endothelial cells, vWf) **C)** proliferation marker (Ki67), **D)** plasminogen activator inhibitor-1 (PAI-1), **E)** macrophages (CD68) markers, and **F)** ferritin staining from immunohistochemistry. Graphs: Mean+SE, n = 8-9, General Linear Model (Univariate), ns: not significant, **p*<0.05, ***p*<0.01, ****p*<0.001. Ads: SGBS-derived adipocytes.
